# Supplementary material for: Antidepressant Effects of Rosemary Extracts Associate With Anti-inflammatory Effect and Rebalance of Gut Microbiota
Source: Front Pharmacol. 2018 Oct 2;9:1126. doi: 10.3389/fphar.2018.01126 (PMC6192164; doi:10.3389/fphar.2018.01126)
Supplement: Supplementary file 1 [file Table_1.xlsx]

## Sheet: Sheet1
Table 1
	A	Total Distance (cm)			B	Entries in center			C	Distance in Center (%)			D	Time in Center (%)			E	Immobility Duration of Tail suspension test(%)			F	Immobility Duration of Forced swimming test(%)
sample/group	CON	CRS	RE+CRS		CON	CRS	RE+CRS		CON	CRS	RE+CRS		CON	CRS	RE+CRS		CON	CRS	RE+CRS		CON	CRS	RE+CRS
1	2080.19	1609.18	2474.59		9	3	1		9.472	1.166	3.72		5.351	0.788	2.58		19.845	31.077	13.17		6.49	21.263	2.17
2	2319.3	1865.88	2802.55		6	8	12		3.973	4.7136	9.77		5.129	3.056	5		2.538	38.538	9		9.141	16.995	6.2
3	1969.25	1765.21	3808.67		14	7	15		15.898	3.6846	13.67		7.718	3.902	8.44		1.215	22.086	4.13		24.2	32.285	0
4	2043.28	2017.71	1876.07		11	4	23		17.275	1.97	10.3		9.764	1.004	5.4		13.41	20.412	16.47		7.513	39.49	25.15
5	2615.06	2092.8	1522.72		13	2	27		14.044	9.3196	19.95		6.809	3.218	10.24		4.725	20.16	10		10.868	11.352	2.28
6	1834.24	1769.04	1775.92		15	6	1		10.435	12.191	1.85		4.559	3.884	4.87		21.627	13.41	5.3		10.582	24.233	27.17
7	2068.72	2194.45	2113.01		5	3	4		5.899	3.9198	2.47		2.714	1.814	1.58		10.422	12.528	14.48		21.142	7.942	29.18
8	2346.63	1932.64	2029.59		6	12	14		7.501	6.899	18.09		3.839	4.982	7.42		12.168	10.035	13.7		0.682	20.603	9.4
9	1676.22	1606.91	1114.04		14	10	8		20.704	10.2408	7.7		12.999	7.464	4.98		0.36	29.943	8.62		1.155	8.272	2.4
10	2200.46	2422.3	2412.87		4	9	6		3.82	7.5164	14.41		3.976	4.064	3.52		4.5	19.188	6.2		7.733	17.358	0.3
11	2446.7	2060.41	2803.09		11	18	23		6.358	16.7382	20.47		5.54	6.377	12.18		32.04	12.528	6.52		13.497	20.075	3.23
12	2144.24	1938.53	2249.34		15	5	25		19.534	5.527	15.8		13.662	3.659	12.36		21.555	11.448	0.95		9.504	22.363	0.12
	df	F	P		df	F	P		df	F	P		df	F	P		df	F	P		df	F	P
	2	1.451	>0.05		2	2.537	>0.05		2	2.3	>0.05		2	3.702	<0.05		2	5.789	<0.01		2	5.222	<0.05
	33				33				33				33				33				33
	Table 1 Antidepressant-like behaviors of RE in CRS mice. (A) Total distance in OFT. (B) Entries in center in OFT. (C) Distance in center in OFT. (D) Time in center in OFT. (E) Immobility duration in TST. (F) Immobility duration in FST. n = 12 per group. CON, CRS and RE+CRS represent the control group, the group of chronic restraint stress, and the treatment group of rosemary extracts pretreatment…
																12.36

## Sheet: Sheet2
Table 2
	A	shannon curve			B	NMDS			C	Community barplot analysis			D	Firmicutes			E	Bacteroidetes			F	Proteobacteria			G	Lactobacillus on genus level
sample/group	CON	CRS	RE+CRS			NMDS1	NMDS2		shown in D,E,F			n/group	CON	CRS	RE+CRS		CON	CRS	RE+CRS		CON	CRS	RE+CRS		CON	CRS	RE+CRS
1	0.697	1.0328	0.5386		CON	-0.1383	-0.0492					1	0.821	0.4355	0.8769		0.1435	0.4744	0.1053		0.0175	0.0872	0.0147		0.7227	0.3415	0.7896
2	0.588	0.9472	0.4599			-0.0141	-0.0018					2	0.6988	0.4948	0.8699		0.2825	0.3948	0.1087		0.0042	0.0884	0.0015		0.6254	0.3854	0.7235
3	0.4983	0.9253	0.4358			-0.1248	0.1178					2	0.8668	0.6094	0.7893		0.1014	0.3185	0.2062		0.0053	0.0488	0.004		0.6015	0.4744	0.5001
					CRS	0.3152	-0.0017
						0.1484	0.0115						df	F	P		df	F	P		df	F	P		df	F	P
						0.2486	-0.0202						2	16.287	<0.01		2	9.419	<0.05		2	22.016	<0.01		2	6.427	<0.05
					RE+CRS	-0.205	-0.0679						6				6				6				6
						-0.147	0.0195
						-0.0829	-0.0079
Table 2 RE reversed changes of intestinal microflora induced by CRS. (A) Shannon curves on phylum level. (B) NMDS on phylum level. (C) Community barplot analysis on phylum level. One-way ANOVA box plot on phylum level about (D) Firmicutes, (E) Bacteroidetes and (F) Proteobacteria and on genus level about (G) Lactobacillus. n = 3 per group. RE+CRS, CRS and CON represent the treatment group of rose…

## Sheet: Sheet3
Table 3
protein/group	CON-1	CON-2	CON-3	CON-4		CRS-1	CRS-2	CRS-3	CRS-4		RE+CRS-1	RE+CRS-2	RE+CRS-3	RE+CRS-4		df	F	P
IL-1β	0.799229	0.913955	1.02533	1.26149		4.47366	3.97084	4.43299	3.53896		1.94886	1.63941	1.55488	0.947018		2,9	81.089	<0.01
TNF-α	0.931166	0.879065	1.03157	1.1582		7.63431	6.81388	5.90226	6.00935		1.51489	3.40923	1.84206	2.35376		2,9	76.164	<0.01
p-NF-κB	0.89686	0.887083	1.12825	1.08781		2.52758	2.38145	2.00743	1.95868		0.918432	0.970456	0.845195	0.980414		2,9	64.568	<0.01
Iba1	0.949672	1.1257	0.909403	1.01523		1.62621	1.56403	1.74743	1.58828		0.856261	0.935106	0.794706	0.721704		2,9	90.507	<0.01
p-AKT/AKT	0.908864	0.970069	1.73347	1.01759		0.294922	0.287451	0.34539	0.37946		1.04497	1.21878	1.12783	1.04834		2,9	16.523	<0.01
BDNF	0.890227	1.12497	1.04545	0.93935		0.398354	0.410495	0.575524	0.495702		0.993113	0.925366	0.891714	0.837154		2,9	43.556	<0.01
Table 3 Protein expression of IL-1β, TNF-α, p-NF κ B, Iba1, p-AKT/AKT and BDNF in hippocampus. IL-1β, TNF-α, p-NF κ B, Iba1, p-AKT/AKT and BDNF protein expression in hippocampus was detected by western blot. n = 4 per group. CON, CRS and RE+CRS represent the control group, the group of chronic restraint stress, and the treatment group of rosemary extracts pretreatment plus chronic restraint stres…

## Sheet: Sheet4
Table 4
protein/group	CON-1	CON-2	CON-3	CON-4		CRS-1	CRS-2	CRS-3	CRS-4		RE+CRS-1	RE+CRS-2	RE+CRS-3	RE+CRS-4		df	F	P
IL-1β	1.10368	1.06428	0.849338	0.982709		3.20425	3.46038	4.43843	2.87382		1.31732	1.50011	2.04764	1.99973		2,9	33.066	<0.01
TNF-α	1.00783	1.06068	0.895826	1.03566		1.71042	1.94996	2.42508	1.84472		0.600766	0.596504	0.877823	0.764487		2,9	44.27	<0.01
p-NF-κB	1.0365	1.08665	0.939264	0.937585		1.36871	1.39838	1.51469	1.23916		0.736424	0.7836	1.08308	1.20466		2,9	9.406	<0.01
Table 4 Protein expression of IL-1β, TNF-α, and p-NF-κ B p65 in microglia pretreated by RE. BV-2 microglia were incubated with RE (5μM, 5μM was the amount of substance of carnosic acid, and RE contained 60% carnosic acid.) for 1 h, prior to treatment with LPS for 3 h. Western blot analysis was performed to examine IL-1β, TNF-α, and p-NF-κ B p65 expression. n = 4 per group. CON, LPS and RE+LPS rep…

## Sheet: Sheet5
Table 5
protein	IL-1β				TNF-α
sample	CON	CRS	RE+CRS		CON	CRS	RE+CRS
1	39.34	99.48	42.5		10.32	20.32	10.26
2	49.7	93.72	57.86		9.01	18.43	9.09
3	43.86	85.14	38.84		7.69	22.53	8.35
	df	F	P		df	F	P
	2,6	37.362	<0.01		2,6	55.861	<0.01
Table 5 RE reduced IL-1β and TNF-α levels augmented by CRS in mice serum. CRS Mice were pretreated with RE (100 mg/kg) for 21 d. IL-1β and TNF-α levels in serum were detected by ELISA. n = 3 per group. CON, CRS and RE+CRS represent the control group, the group of chronic restraint stress, and the treatment group of rosemary extracts pretreatment plus chronic restraint stress, respectively.
